# Supplementary material for: High-strength, ultra-thin anion exchange membranes with a branched structure toward alkaline membrane fuel cells
Source: Royal Society of Chemistry journal article supplement (doi:10.1039/d2ta09914d), 2023-01-01
Supplement: d2ta09914d1.pdf [file d2ta09914d1.pdf]

1

## Supporting Information

2

### 3 **High-strength, ultra-thin anion exchange** 4 **membranes with branched structure toward** 5 **alkaline membrane fuel cells**

6 *Xiaofeng Li<sup>a,b</sup>, Bin Zhang<sup>a,b</sup>, Jing Guo<sup>a</sup>, Yaohan Chen<sup>a</sup>, Lei Dai<sup>a</sup>, Jifu Zheng<sup>a,\*</sup>,*

7 *Shenghai Li<sup>a,b,\*</sup>, Suobo Zhang<sup>a,b</sup>*

8

9 <sup>a</sup> Key Laboratory of Polymer Ecomaterials, Changchun Institute of Applied Chemistry,

10 Chinese Academy of Sciences, Changchun, 130022, China

11 <sup>b</sup> University of Science and Technology of China, Hefei, 230026, China

12

13 \* Corresponding author email: [jfzheng@ciac.ac.cn](mailto:jfzheng@ciac.ac.cn) (J. Z.); [lsh@ciac.ac.cn](mailto:lsh@ciac.ac.cn) (S. L.)

14



1 column chromatography (hexanes: ethyl acetate =10 :1) to obtain white solid (10.2 g,  
2 76.7% yield).

3 The monomer **B** (2.7 g, 0.01 mol) was dissolved in 100 mL dichloromethane (DCM)  
4 with 1.3 mL CH<sub>3</sub>COOH. Then, excessive HCl aqueous solution (12 M, 10 mL) was  
5 dripped with continuous stir at room temperature. After dropping, the solution was  
6 heated to 60 °C overnight. The reacted solution was neutralized with NaHCO<sub>3</sub>, and then  
7 oil phase was separated for further purification via column chromatography (hexanes:  
8 DCM =20 :1) to obtain white solid (2.1 g, 84.8% yield). <sup>1</sup>H NMR (500 MHz, CDCl<sub>3</sub>,  
9 ppm) δ 7.94 (d, 1H), 7.83 (d, 1H), 7.78-7.72 (m, 2H), 7.45-7.32 (m, 4H), 6.81 (t, 1H),  
10 2.91 (m, 2H), 1.76 (m, 2H), 1.50 (m, 4H), 1.01 (t, 3H). <sup>13</sup>C NMR (125 MHz, CDCl<sub>3</sub>,  
11 ppm) δ 140.83, 139.48, 138.59, 137.64, 135.37, 131.39, 127.64, 127.35, 126.92,  
12 129.87, 124.98, 119.83, 119.70, 119.51, 31.86, 29.80, 29.42, 22.79, 14.16. (Figure S2)  
13

#### 14 Synthesis of 9-dodecyldene-9H-fluorene (DDF)

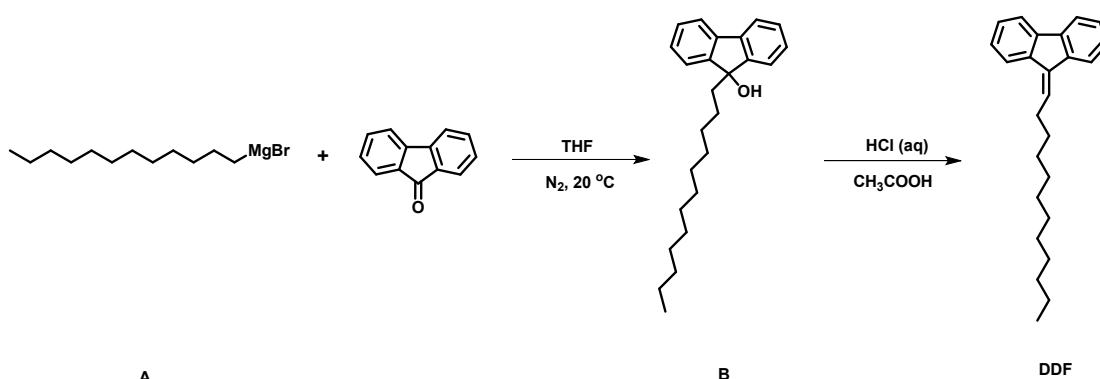

15

A

B

DDF

16 The dodecylmagnesium bromide **A** was synthesized via Grignard reaction which  
17 referred to literature<sup>2</sup> and prepared 1 M solution in dry THF. 9-Fluorenone (9.0 g, 0.05  
18 mol) was completely dissolved in 150 mL dry THF with continuous ventilate of

1 nitrogen. Then, monomer **A** (1M, 60 mL) was placed in dropping funnel and dripped  
2 into solution slowly. The temperature of reaction was controlled at 20 °C. After  
3 dropping, the reacted solution was quenched by NH<sub>4</sub>Cl saturated aqueous solution. The  
4 oil phase was dried with MgSO<sub>4</sub> and removed solvent in vacuum. Finally, the monomer  
5 **B** was purified via column chromatography (hexanes: ethyl acetate =10 :1) to obtain  
6 yellow solid (14.6 g, 83.4% yield).

7 The monomer **B** (3.4 g, 0.01 mol) was dissolved in 100 mL DCM with 1.3 mL  
8 CH<sub>3</sub>COOH. Then, excessive HCl aqueous solution (12 M, 10 mL) was dripped with  
9 continuous stir at room temperature. After dropping, the solution was heated to 60 °C  
10 overnight. The reacted solution was neutralized with NaHCO<sub>3</sub>, and then oil phase was  
11 separated for further purification via column chromatography (hexanes: DCM =20 :1)  
12 to obtain white solid (2.7 g, 81.8% yield). <sup>1</sup>H NMR (500 MHz, CDCl<sub>3</sub>, ppm) δ 7.99-  
13 7.61 (m, 4H), 7.46-7.24 (m, 4H), 6.78 (t, 1H), 2.87 (m, 2H), 1.71 (m, 2H), 1.55-1.20  
14 (m, 16H), 0.90 (t, 3H). <sup>13</sup>C NMR (125 MHz, CDCl<sub>3</sub>, ppm) δ 140.85, 139.50, 138.62,  
15 137.66, 135.39, 131.40, 127.65, 127.36, 126.93, 126.88, 125.01, 119.85, 119.72,  
16 119.53, 32.05, 29.80, 29.78, 29.73, 29.68, 29.50, 22.83, 14.26. (Figure S3)

17

### 18 Synthesis of model polymers (Route I: fluorene-type and *N*-methyl-4-piperidone)

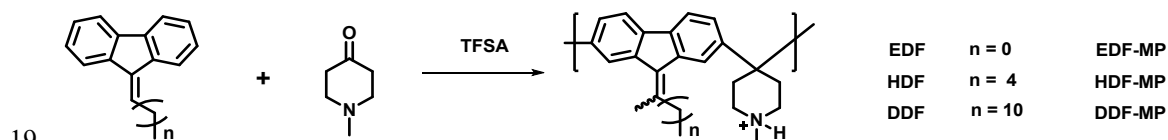

20

21 *EDF-MP*. The *N*-methyl-4-piperidone (0.17 g, 1.5 mmol) and EDF (0.20 g, 1.0

1 mmol) were added into a pressure bottle with 1 mL dry dichloromethane as solvent.  
2 Then, 0.2 mL TFA and 0.8 mL TFSA were added into system as catalysts when the  
3 temperature was reduced to 0 °C. After 12 h of polymerization, the mixture was poured  
4 into water to precipitate the polymer. The solid was dried via lyophilization to obtain  
5 0.30 g as yellow powder.

6 *HDF-MP*. The *N*-methyl-4-piperidone (0.17 g, 1.5 mmol) and HDF (0.25 g, 1.0  
7 mmol) were added into a pressure bottle with 1 mL dry dichloromethane as solvent.  
8 Then, 0.2 mL TFA and 0.8 mL TFSA were added into system as catalysts when the  
9 temperature was reduced to 0 °C. After 12 h of polymerization, the mixture was poured  
10 into water to precipitate the polymer. The solid was dried via lyophilization to obtain  
11 0.33 g as yellow powder.

12 *DDF-MP*. The *N*-methyl-4-piperidone (0.17 g, 1.5 mmol) and DDF (0.33 g, 1.0  
13 mmol) were added into a pressure bottle with 1 mL dry dichloromethane as solvent.  
14 Then, 0.2 mL TFA and 0.8 mL TFSA were added into system as catalysts when the  
15 temperature was reduced to 0 °C. After 12 h of polymerization, the mixture was poured  
16 into water to precipitate the polymer. The solid was dried via lyophilization to obtain  
17 0.41 g as yellow powder.

18

## 19 Synthesis of model polymers (Route II: fluorene-type and biphenyl)

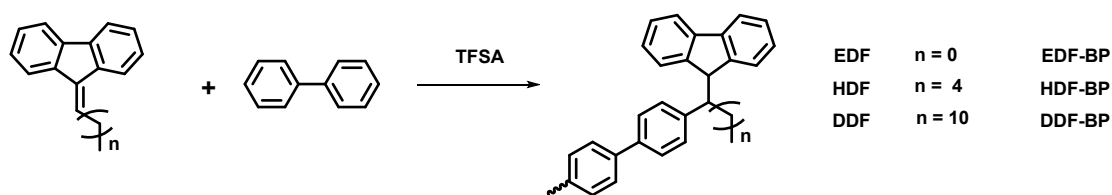

1     *EDF-BP*. The biphenyl (0.16 g, 1.0 mmol) and EDF (0.19 g, 1.0 mmol) were added  
2 into a pressure bottle with 1 mL dry dichloromethane as solvent. Then, 1 mL TFSA  
3 was added into system as catalysts when the temperature was reduced to 0 °C. After 12  
4 h of polymerization, the mixture was poured into water and neutralized with NaHCO<sub>3</sub>.  
5 After removing extra solvent in vacuum, the final product 0.28 g was obtained as brown  
6 solid.

7     *HDF-BP*. The biphenyl (0.16 g, 1.0 mmol) and HDF (0.25 g, 1.0 mmol) were added  
8 into a pressure bottle with 1 mL dry dichloromethane as solvent. Then, 1 mL TFSA  
9 was added into system as catalysts when the temperature was reduced to 0 °C. After 12  
10 h of polymerization, the mixture was poured into water and neutralized with NaHCO<sub>3</sub>.  
11 After removing extra solvent in vacuum, the final product 0.37 g was obtained as brown  
12 liquid.

13     *DDF-BP*. The biphenyl (0.16 g, 1.0 mmol) and DDF (0.33 g, 1.0 mmol) were added  
14 into a pressure bottle with 1 mL dry dichloromethane as solvent. Then, 1 mL TFSA  
15 was added into system as catalysts when the temperature was reduced to 0 °C. After 12  
16 h of polymerization, the mixture was poured into water and neutralized with NaHCO<sub>3</sub>.  
17 After removing extra solvent in vacuum, the final product 0.44 g was obtained as brown  
18 liquid.

19

20 **Synthesis of model polymers (Route III: fluorene-type and itself)**

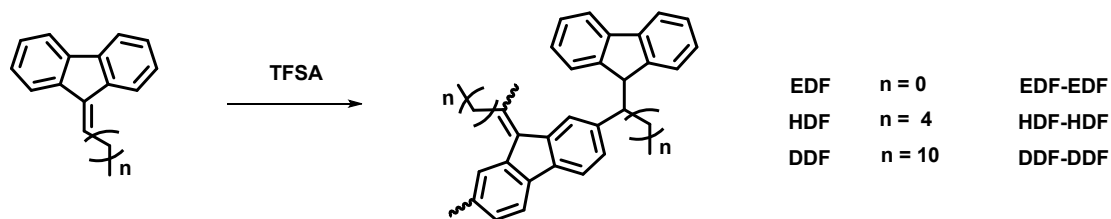

1

2 *EDF-EDF*. The EDF (0.38 g, 2.0 mmol) were added into a pressure bottle with 1 mL  
 3 dry dichloromethane as solvent. Then, 1 mL TFSA was added into system as catalyts  
 4 when the temperature was reduced to 0 °C. After 12 h of polymerization, the mixture  
 5 was poured into water and neutralized with NaHCO<sub>3</sub>. After removing extra solvent in  
 6 vacuum, the final product 0.33 g was obtained as brown solid.

7 *HDF-HDF*. The HDF (0.37 g, 1.5 mmol) were added into a pressure bottle with 1  
 8 mL dry dichloromethane as solvent. Then, 1 mL TFSA was added into system as  
 9 catalyts when the temperature was reduced to 0 °C. After 12 h of polymerization, the  
 10 mixture was poured into water and neutralized with NaHCO<sub>3</sub>. After removing extra  
 11 solvent in vacuum, the final product 0.36 g was obtained as brown liquid.

12 *DDF-DDF*. The EDF (0.33 g, 1.0 mmol) were added into a pressure bottle with 1  
 13 mL dry dichloromethane as solvent. Then, 1 mL TFSA was added into system as  
 14 catalyts when the temperature was reduced to 0 °C. After 12 h of polymerization, the  
 15 mixture was poured into water and neutralized with NaHCO<sub>3</sub>. After removing extra  
 16 solvent in vacuum, the final product 0.3 g was obtained as brown liquid.

a]

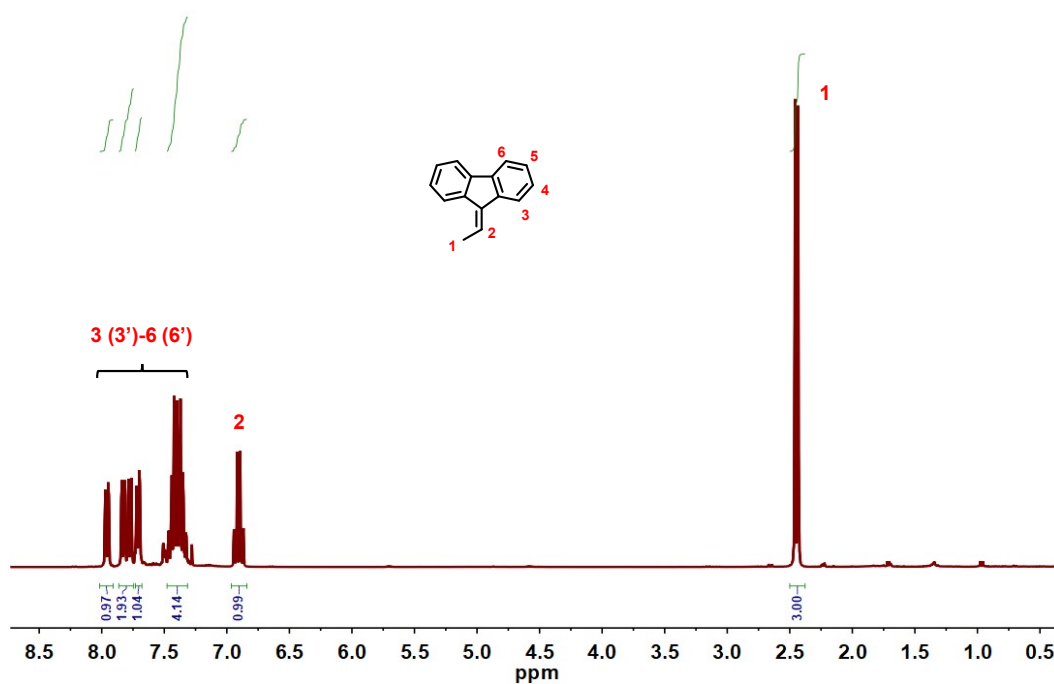

b]

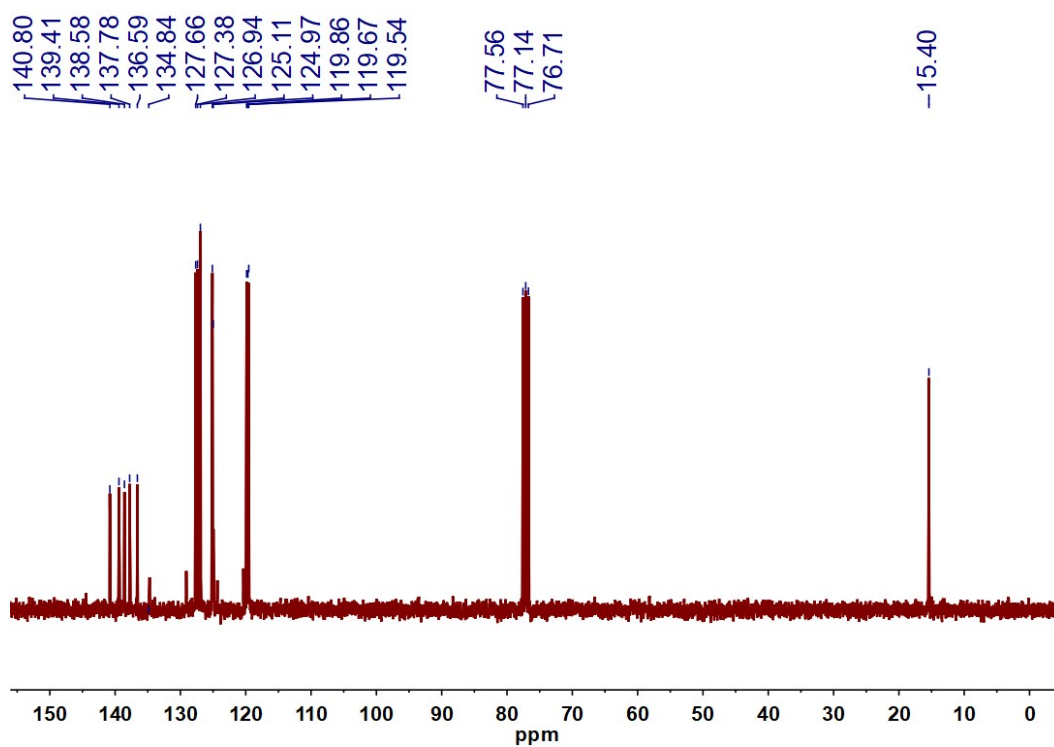

1

2 **Figure S1** (a) <sup>1</sup>H NMR spectra and (b) <sup>13</sup>C NMR spectra of monomer 9-ethylidene-9H-

3 fluorene in CDCl<sub>3</sub>.



al

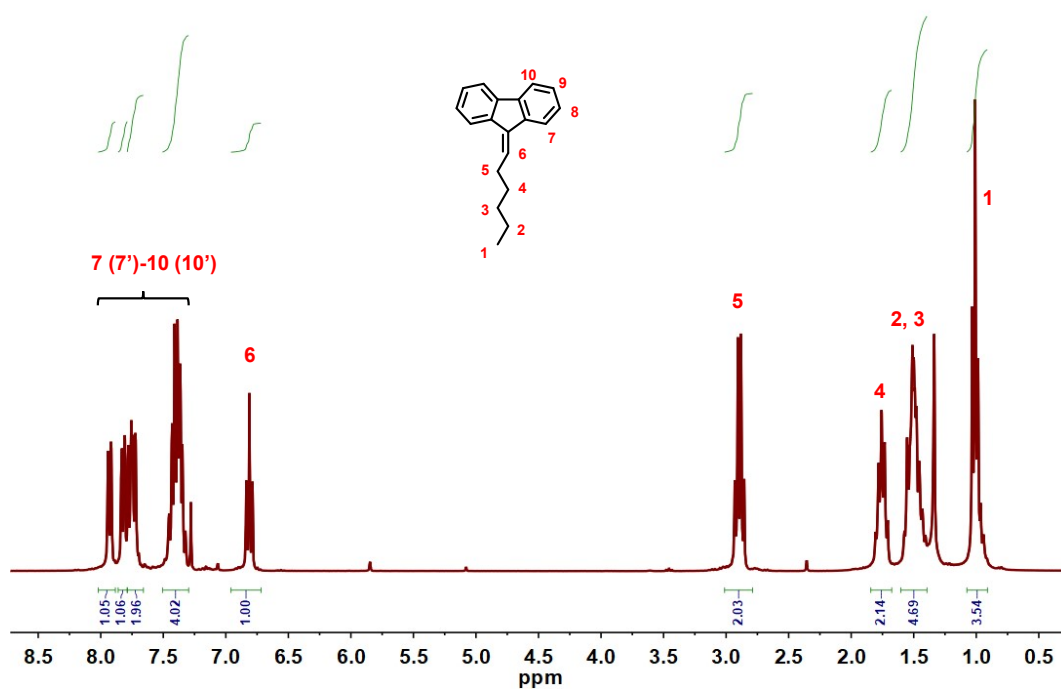

bl

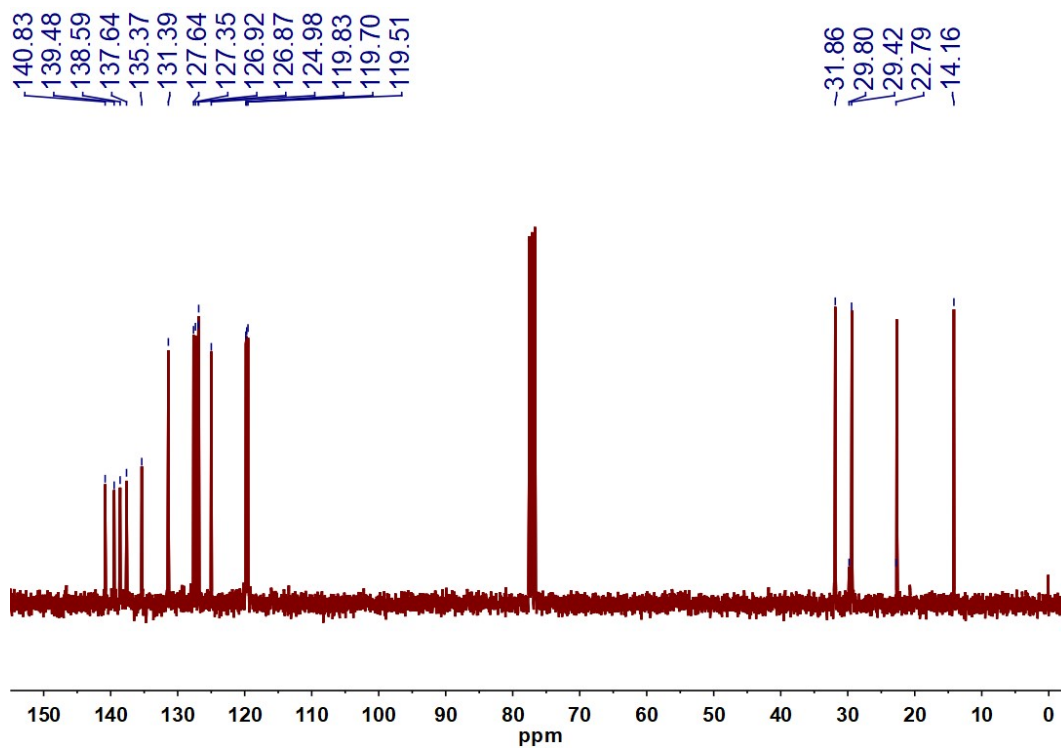

1

2 **Figure S2** (a)  $^1\text{H}$  NMR spectra and (b)  $^{13}\text{C}$  NMR spectra of monomer 9-hexylidene-  
3 *9H*-fluorene in  $\text{CDCl}_3$ .

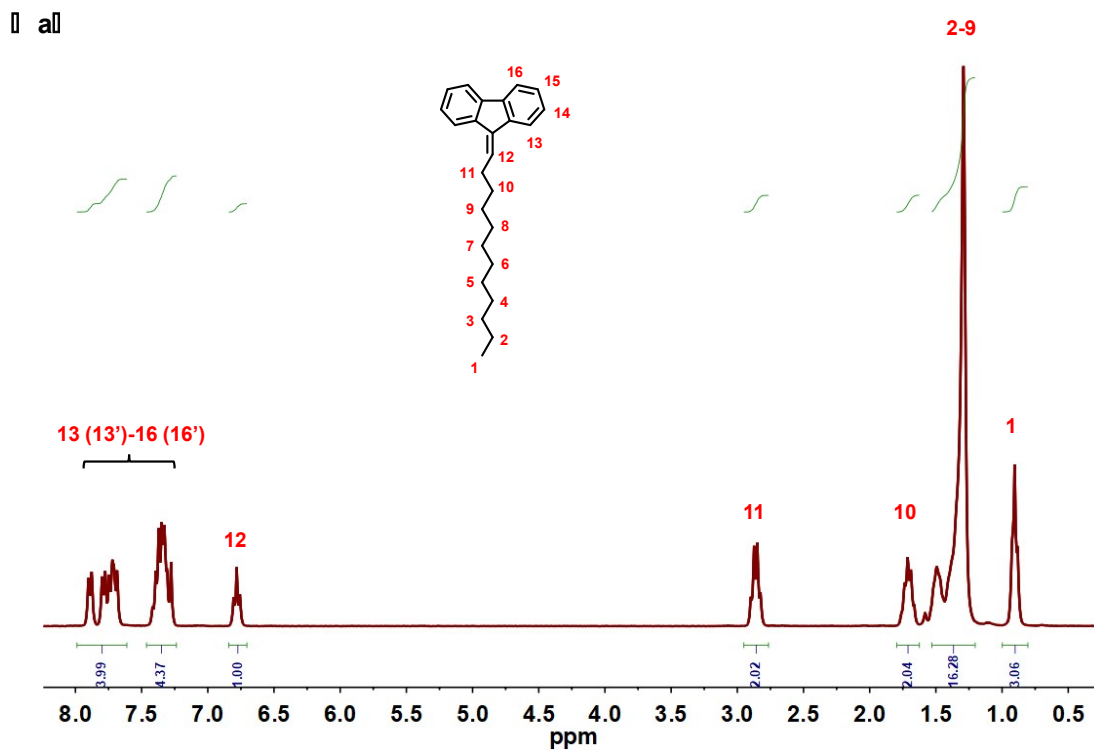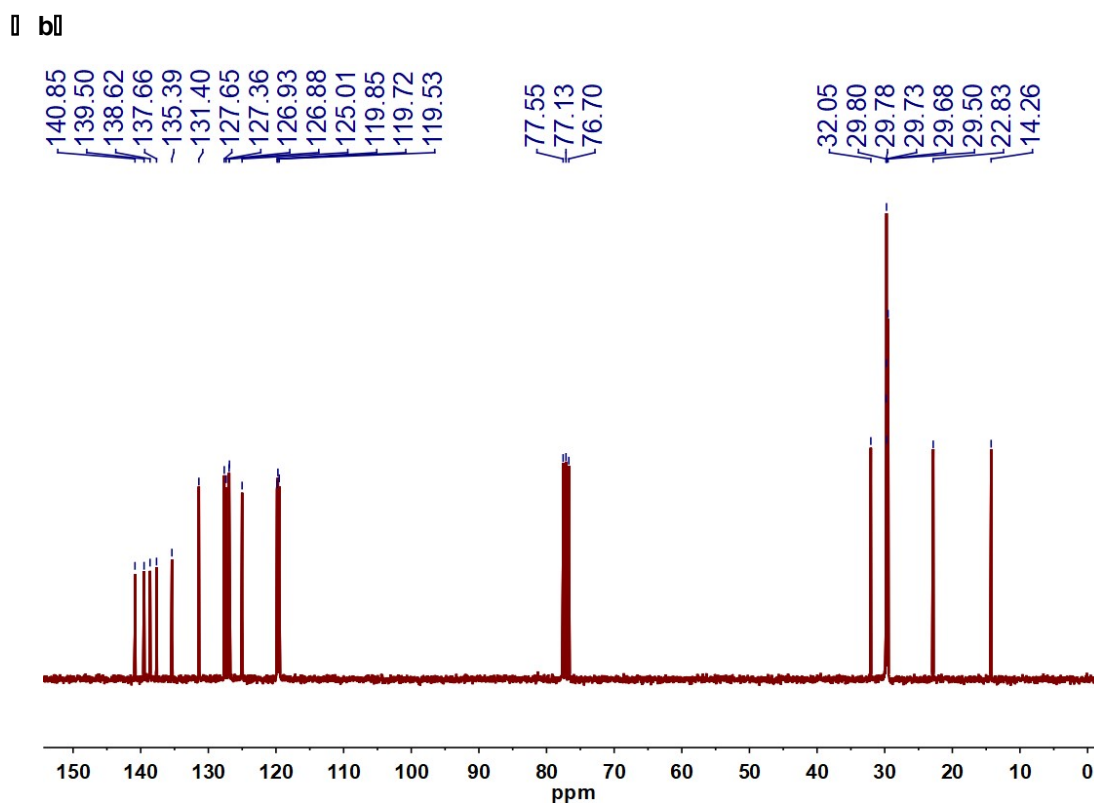

1

2 **Figure S3** (a)  $^1\text{H}$  NMR spectra and (b)  $^{13}\text{C}$  NMR spectra of monomer 9-dodecylidene-

3 9*H*-fluorene in  $\text{CDCl}_3$ .

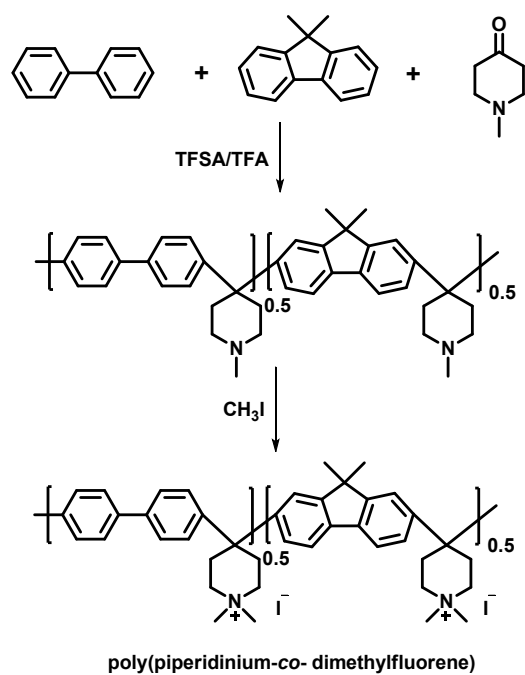

1

2 **Figure S4** The synthetic procedure and chemical structure of poly(piperidinium-co-

3 dimethylfluorene) which used as fuel cell binder.

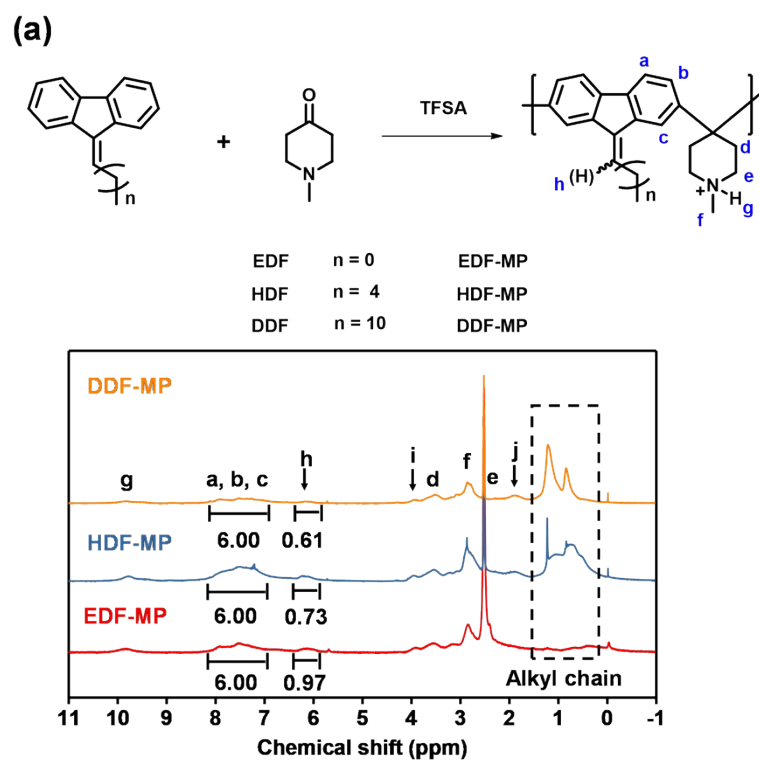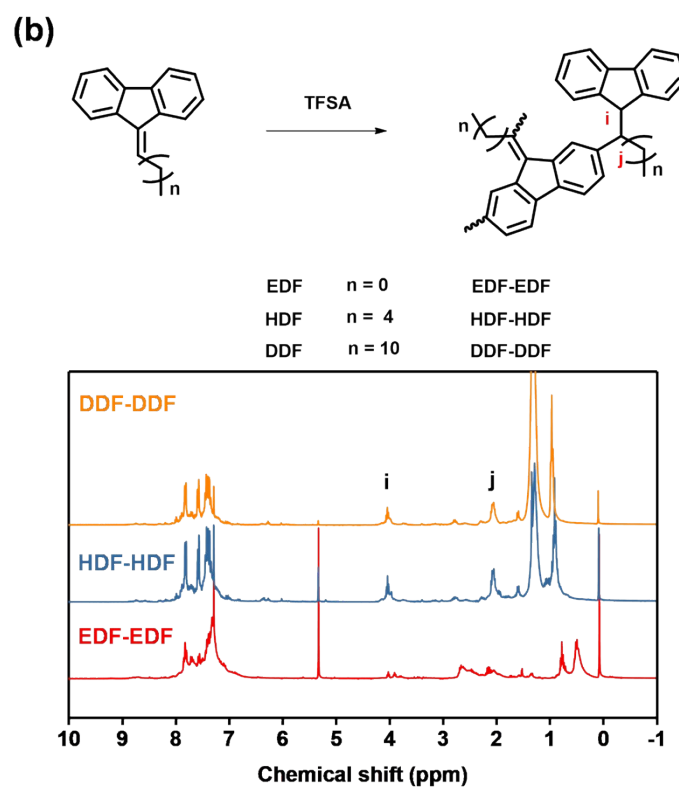

1

2 **Figure S5** (a)  $^1\text{H}$  NMR spectroscopy of model polymers EDF-MP, HDF-MP and DDF-

3 MP in  $d_6$ -DMSO. The 5 wt% TFA to move water peak from 3.3 ppm to 11–14 ppm.

4 (b)  $^1\text{H}$  NMR spectroscopy of EDF-EDF, HDF-HDF and DDF-DDF in  $\text{CDCl}_3$ .

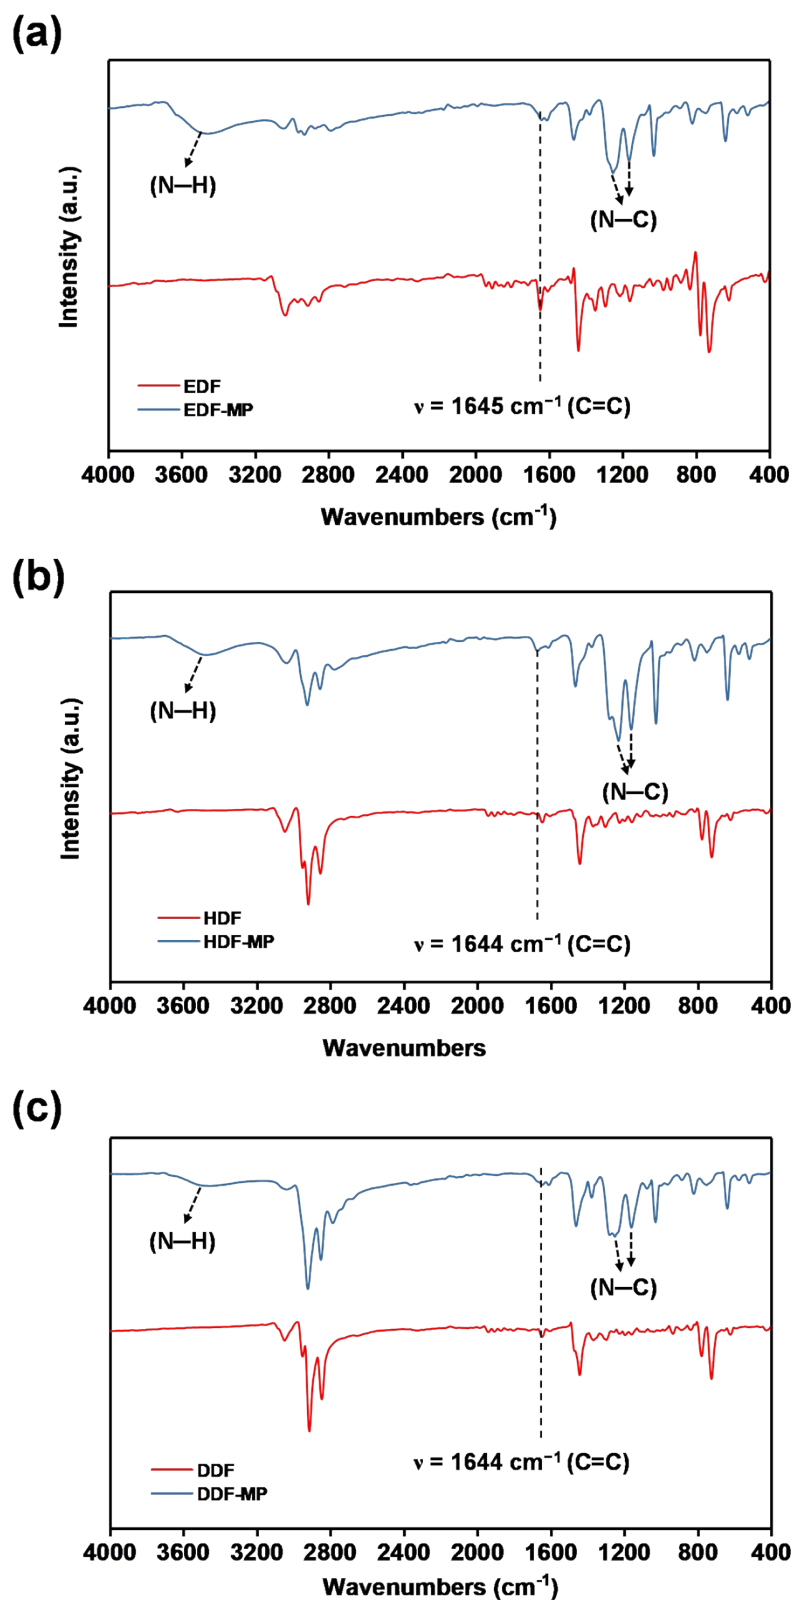

1

2 **Figure S6** The IR spectra of (a) monomer DDF and polymer DDF-MP, (b) monomer

3 EDF and polymer EDF-MP and (c) monomer HDF and polymer HDF-MP.

(a)

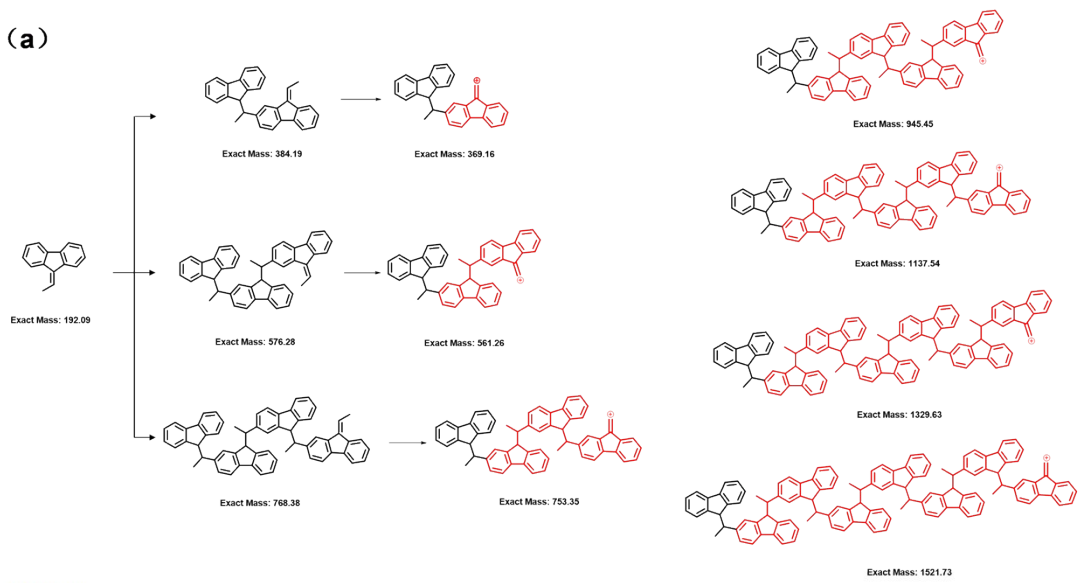

Comment 1  
Comment 2

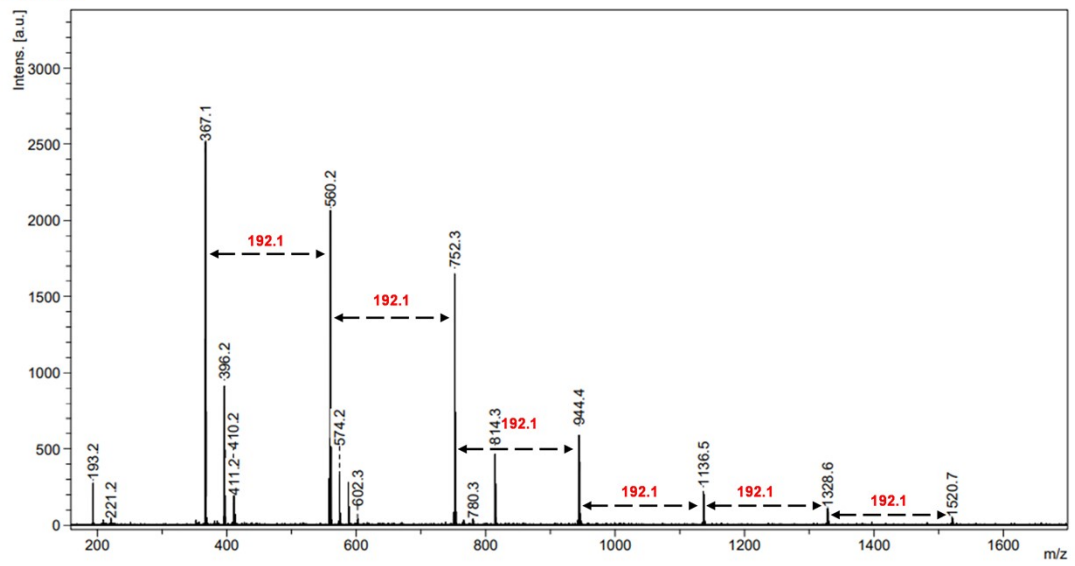

Bruker Daltonics flexAnalysis

(b)

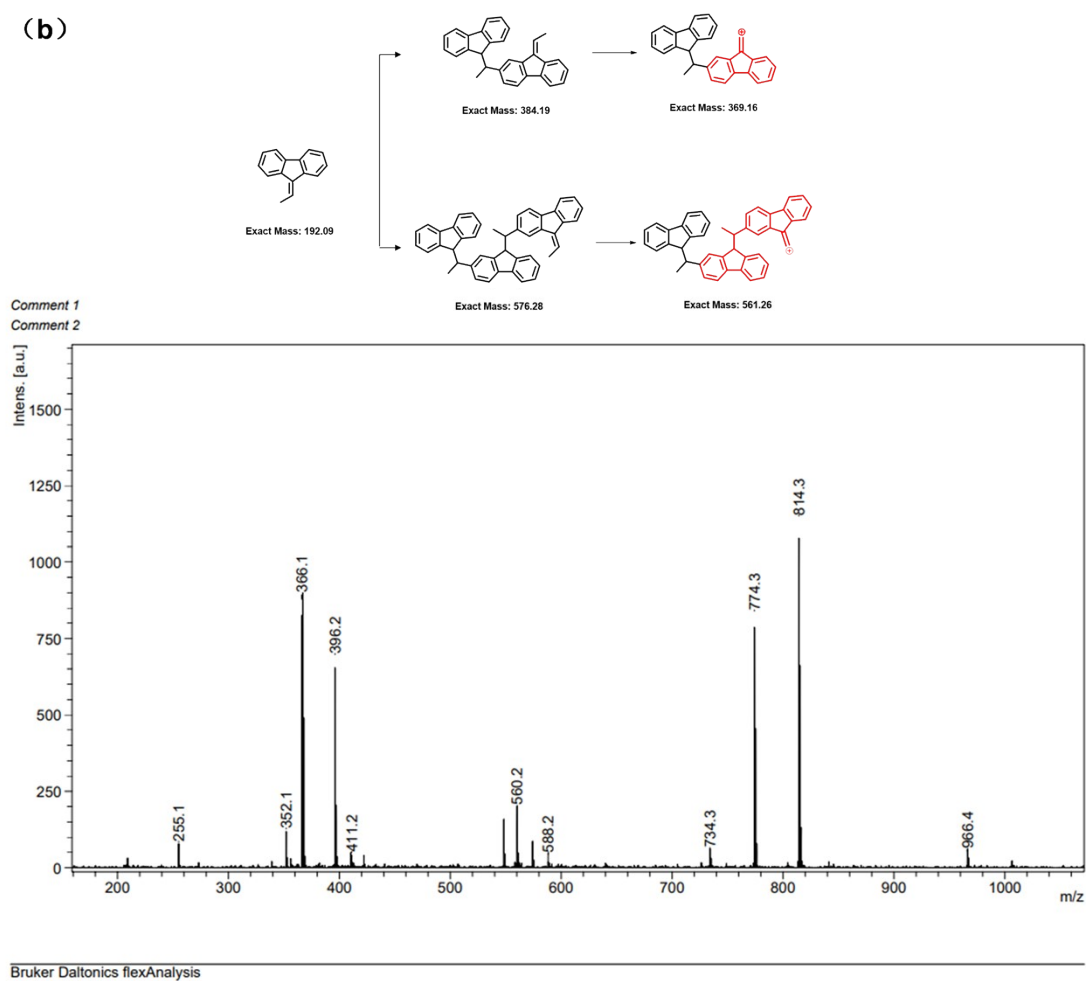

1

2 **Figure S7** The MS analysis of (a) EDF-EDF self-polymerization and (b) reaction of

3 EDF and biphenyl.

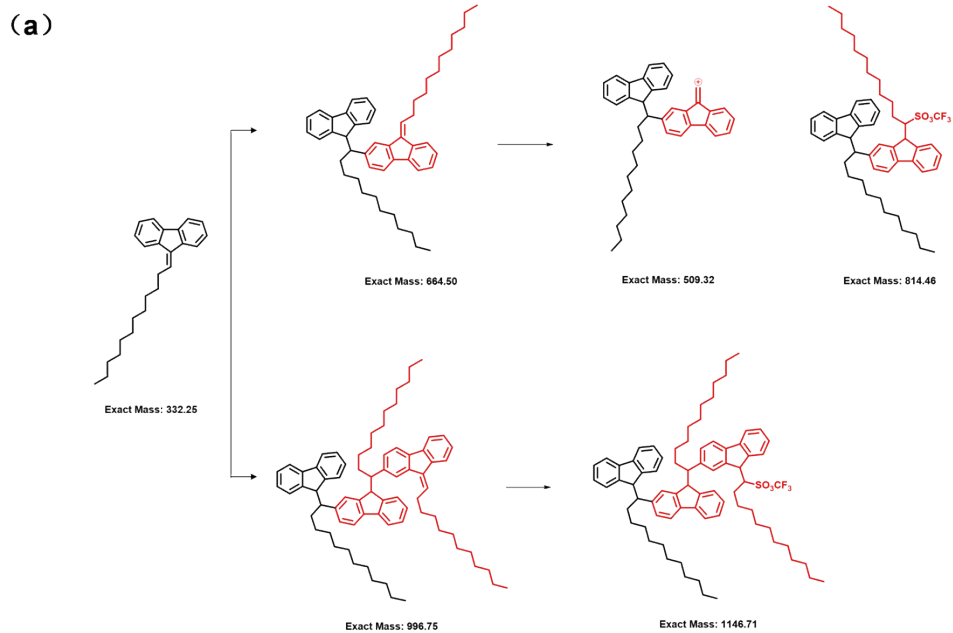

Comment 1  
Comment 2

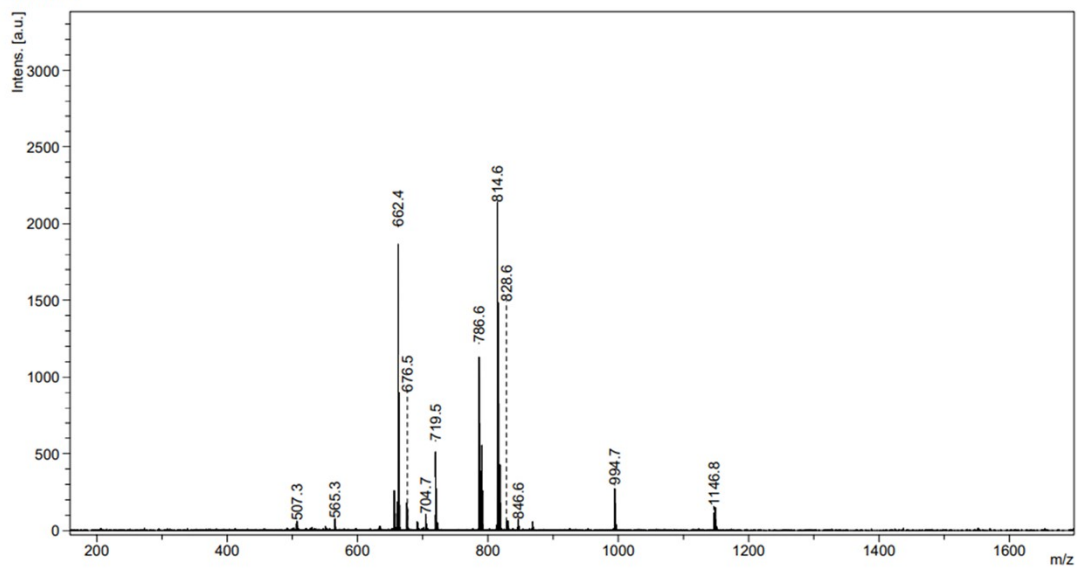



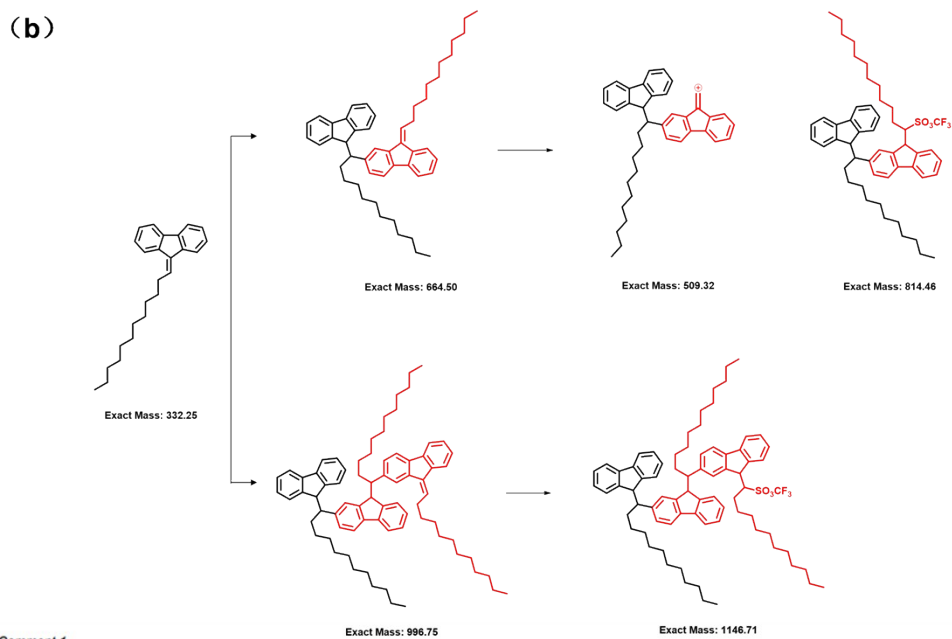

Comment 1

Comment 2

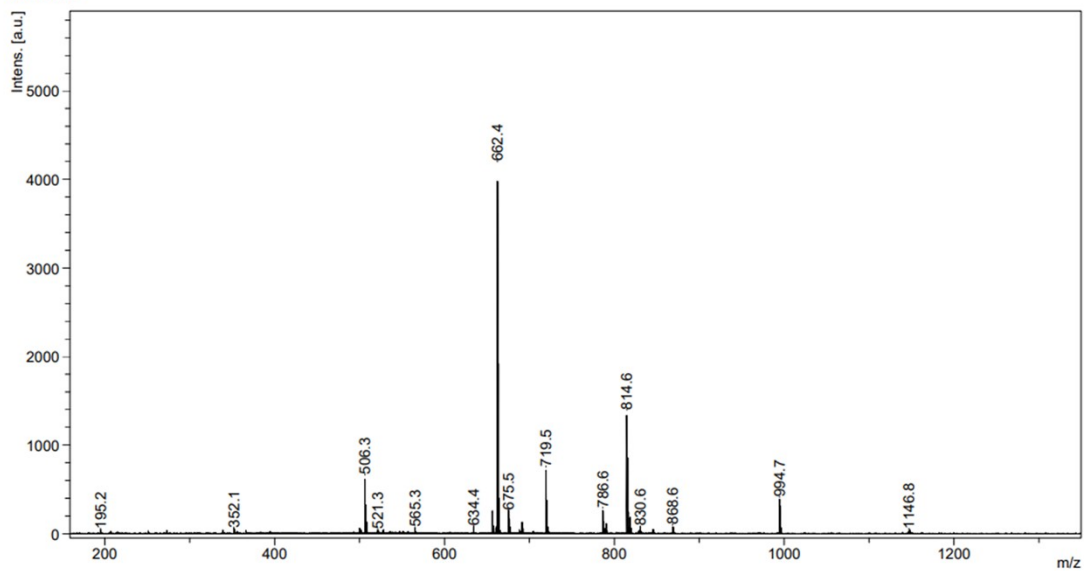

Bruker Daltonics flexAnalysis

1

2 **Figure S8** The MS analysis of (a) DDF-DDF self-polymerization and (b) reaction of

3 DDF and biphenyl.

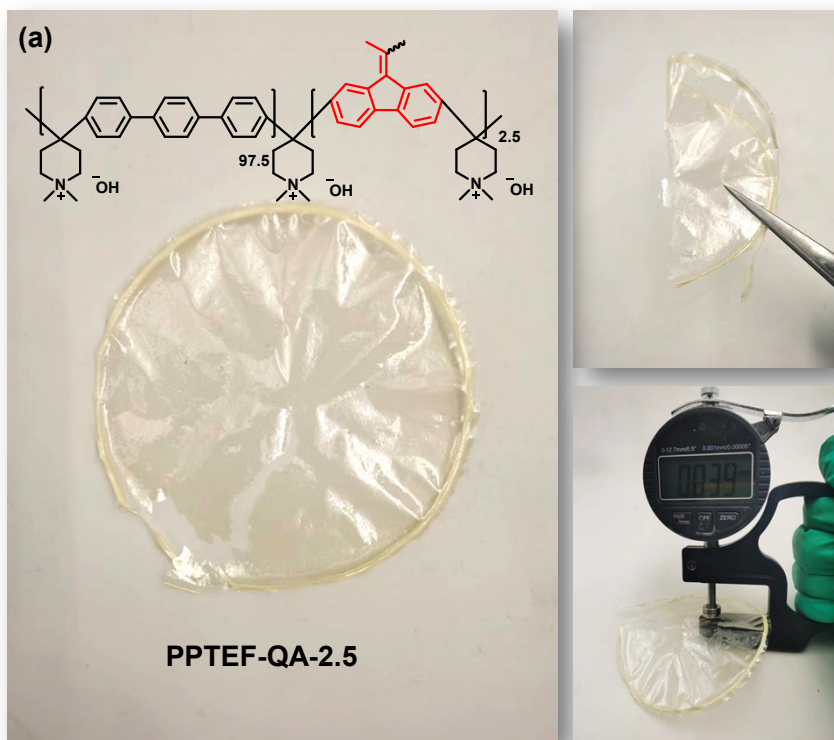

1

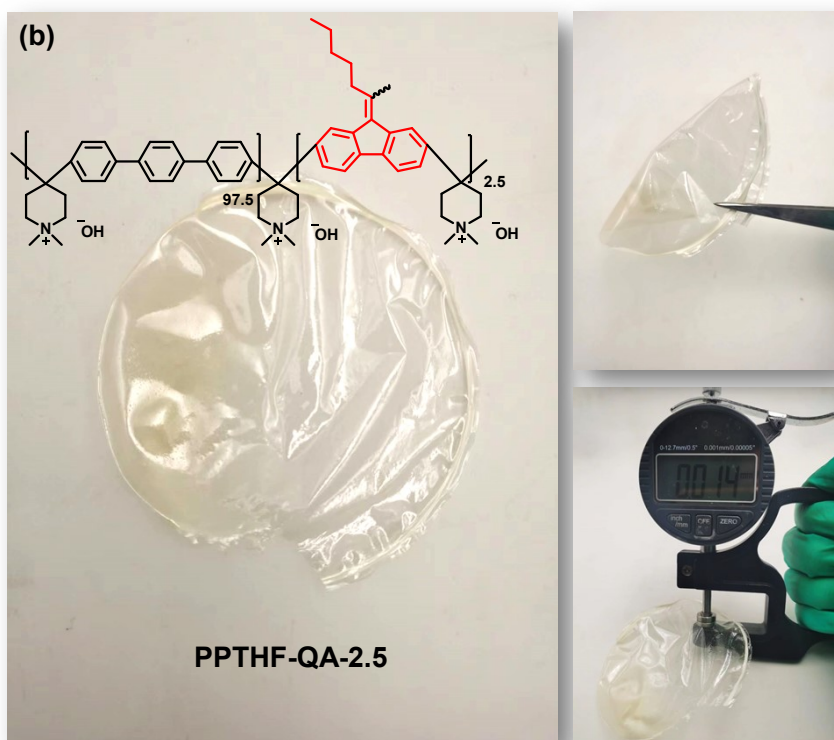

2

3 **Figure S9** (a) The picture of model polymer PPTEF-QA-2.5 membrane and (b) The  
 4 picture of model polymer PPTEF-QA-2.5 membrane in OH<sup>-</sup> form.

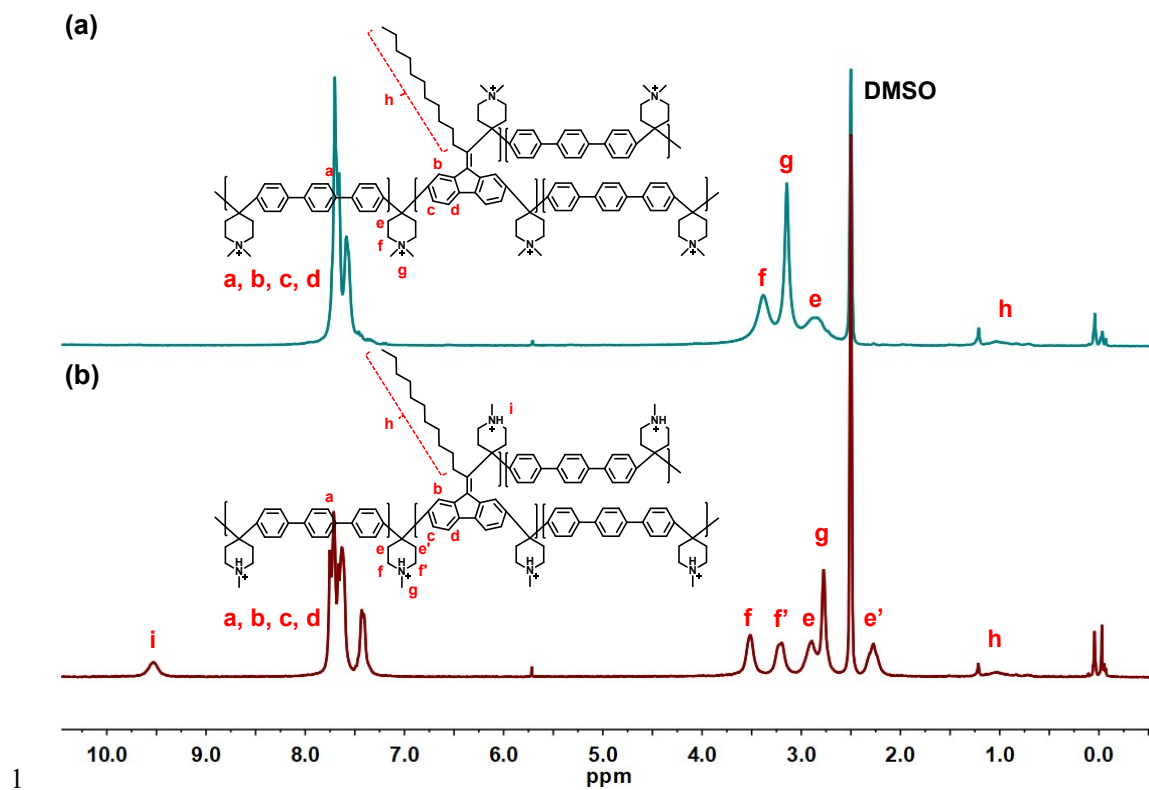

1  
 2 **Figure S10**  $^1\text{H}$  NMR spectroscopy of (a) PPTDF-QA-2.5 and (b) PPTDF-2.5 in  $\text{d}_6\text{-DMSO}$   
 3 with 5 wt% TFA to move water peak from 3.3 ppm to 11-14 ppm.

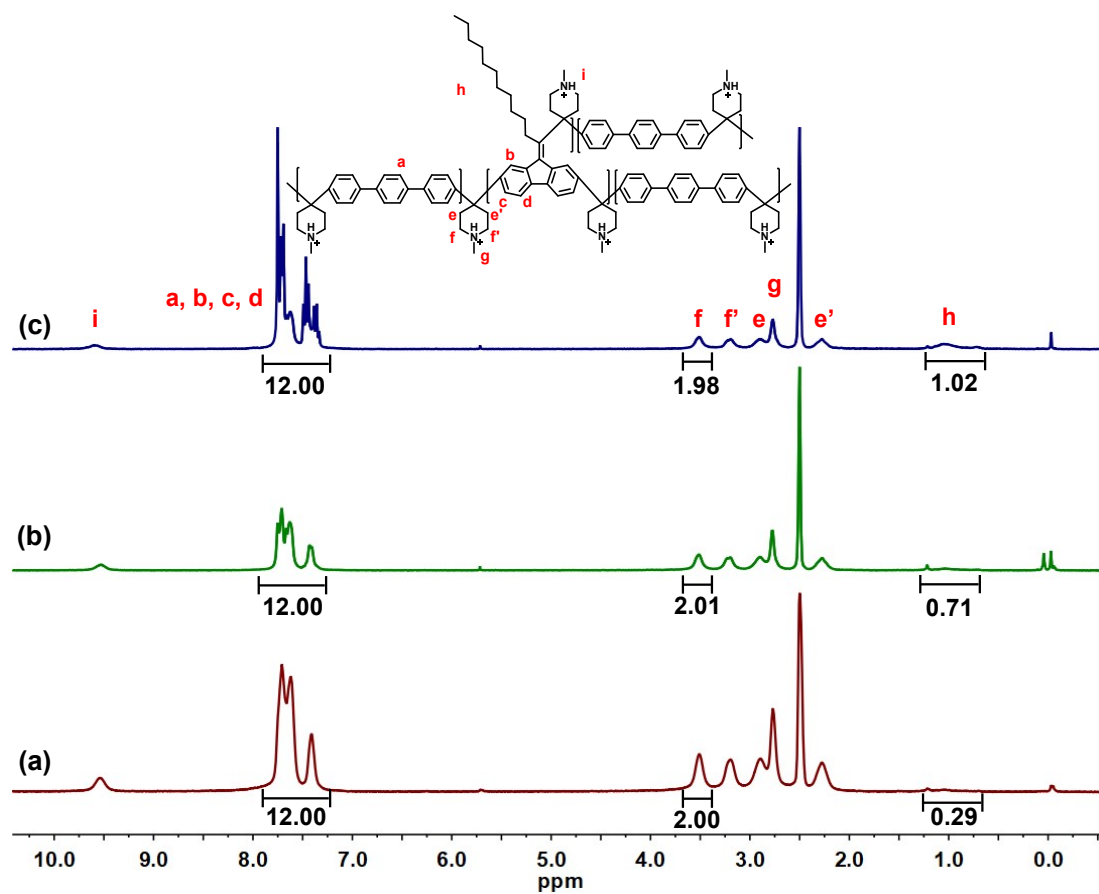

1

2 **Figure S11** The  $^1\text{H}$  NMR spectra of (a) PPTDF-1, (b) PPTDF-2.5 and (c) PPTDF-5  
 3 membrane in  $d_6$ -DMSO. 5 wt% TFA was added to move water peak from 3.3 ppm to  
 4 11-14 ppm.

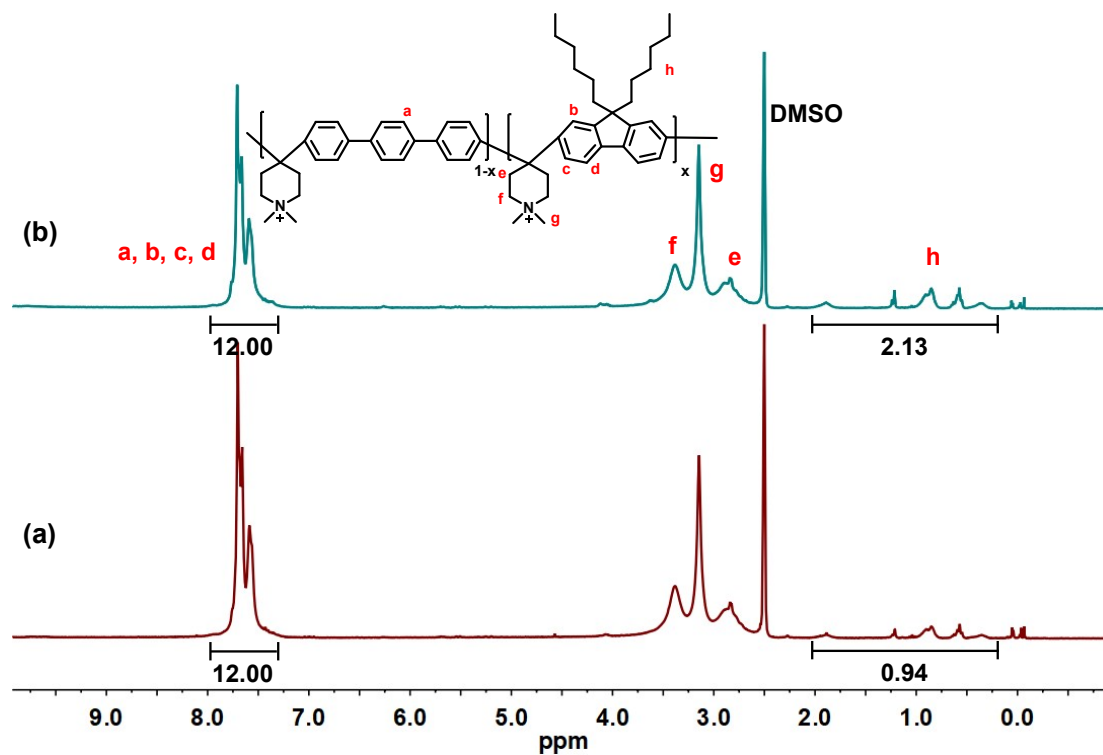

1

2 **Figure S12** The  $^1\text{H}$  NMR spectra of (a) PPTF-QA-5 and (b) PPTF-QA-10 membrane

3 in  $d_6$ -DMSO. 5 wt% TFA was added to move water peak from 3.3 ppm to 11-14 ppm.

4

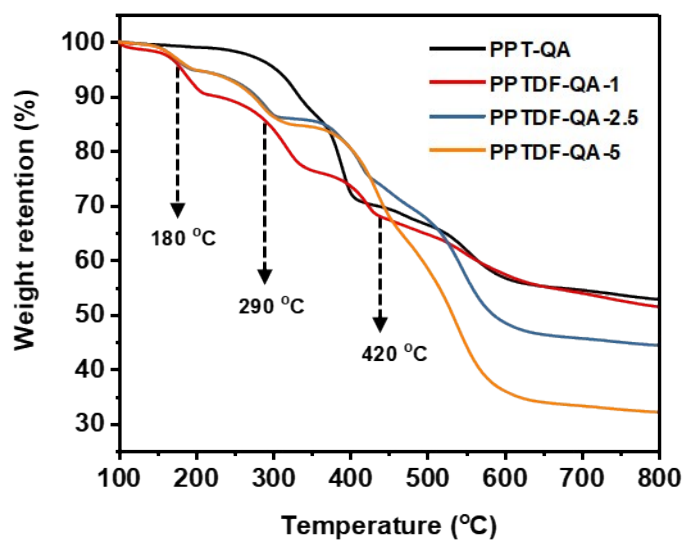

5

6 **Figure S13** The TGA curves of PPTDF-QA-x membranes.

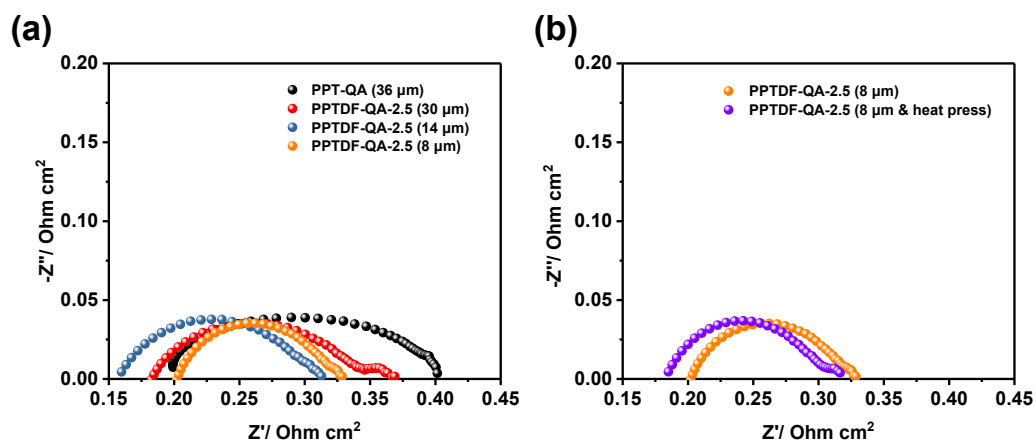

1

2 **Figure S14** (a) and (b) In situ impedance curves of the MEAs with different PPT-QAs

3 at  $200 \text{ mA cm}^{-2}$ .

4

5 **Table S1.** Polymerization of poly(arylene piperidinium)-based copolymers.

| Samples <sup>a</sup> | TFSA: | Piperidone: TP: | Polymerization        | $[\eta]^c$ | Yield |
|----------------------|-------|-----------------|-----------------------|------------|-------|
|                      | DCM   | (EDF/HDF/DDF)   | time <sup>b</sup> (h) |            |       |
| PPT-QA               | 1:1   | 100:100:0       | 12                    | 2.13       | 90.5  |
| PPTDF-QA-1           | 1:1   | 100:99:1        | 6                     | 5.71       | 91.2  |
| PPTDF-QA-2.5         | 1:1   | 101:98:2.5      | 3                     | 6.46       | 87.9  |
| PPTDF-QA-2.5         | 1:1   | 101:98:2.5      | 6                     | —          | 93.3  |
| PPTDF-QA-5           | 1:1   | 100:95:5        | 1                     | —          | 89.5  |
| PPTDF-QA-5           | 1:2   | 100:95:5        | 3                     | —          | 92.4  |
| PPTEF-QA-2.5         | 1:1   | 101:98:2.5      | 3                     | 2.66       | 91.5  |
| PPTHF-QA-2.5         | 1:1   | 101:98:2.5      | 3                     | 5.05       | 89.1  |
| PPTF-QA-5            | 1:1   | 100:95:5        | 12                    | —          | 91    |
| PPTF-QA-10           | 1:1   | 100:90:10       | 12                    | —          | 95.1  |

1 <sup>a</sup> The PPTDF represents the components of piperidone, TP and DDF; PPTEF represents  
 2 the components of piperidone, TP and EDF; PPTHF represents the components of  
 3 piperidone, TP and HDF. <sup>b</sup> The solid content is 25%. <sup>c</sup> Measured at a concentration of  
 4 0.5 g dL<sup>-1</sup> in DMSO at 30 °C.

5

6 **Table S2.** The mechanical properties of branched PPT-QAs with different chain length

| Membranes    | Tensile strength<br>(MPa) | Elongation at<br>break (%) | Young's modulus<br>(MPa) |
|--------------|---------------------------|----------------------------|--------------------------|
| PPTDF-QA-2.5 | 70.0                      | 35                         | 1670                     |
| PPTHF-QA-2.5 | 29.0                      | 5.7                        | 655                      |
| PPTEF-QA-2.5 | 15.8                      | 3.4                        | 613                      |

7

8 **Table S3.** Properties of PPTDF-QA-2.5 and other poly(arylene piperidinium)-based

9 AEMs.

| Samples      | IEC <sub>theor</sub><br>(mmol g <sup>-1</sup> ) | SR <sup>a</sup><br>(%) | $\sigma_{OH^-}$ <sup>a</sup><br>(mS cm <sup>-1</sup> ) | Tensile strength<br>(MPa) | Thickness in<br>FC <sup>b</sup> ( $\mu$ m) | Ref.      |
|--------------|-------------------------------------------------|------------------------|--------------------------------------------------------|---------------------------|--------------------------------------------|-----------|
| PPTDF-QA-2.5 | 2.77                                            | 24                     | 162                                                    | 70                        | 8                                          | This work |
| PPTDF-QA-5   | 2.76                                            | 25                     | 168                                                    | 54.3                      | 25                                         | This work |
| PFTP-13      | 2.81                                            | 20                     | 176                                                    | 85                        | 20 $\pm$ 3                                 | 3         |
| PQP-100      | 2.30                                            | 22                     | 119                                                    | 84                        | 4                                          | 4         |
| PAP-TP-85    | 2.37                                            | 10                     | 170                                                    | 67                        | 25                                         | 5         |
| b-PTP-2.5    | 2.81                                            | 26                     | 147                                                    | 62                        | 20                                         | 6         |

|                       |      |    |     |     |        |    |
|-----------------------|------|----|-----|-----|--------|----|
| PD <sub>6</sub> TP-15 | 2.35 | 42 | 155 | 48  | 22 ± 3 | 7  |
| PTP-90                | 2.52 | 15 | 129 | 29  | —      | 8  |
| PDTP-25               | 2.54 | 30 | 121 | 61  | 25 ± 3 | 9  |
| PFTP@W-PE             | 2.35 | 7  | 72  | 121 | 10     | 10 |

1 <sup>a</sup> Measured at 80 °C. <sup>b</sup> The minimum thickness tested in fuel cell.

2

### 3 Reference

4 1 K. S. Reddy, L. Solà, A. Moyano, M. A. Pericàs and A. Riera, *Synthesis*, 2000, **1**,  
5 165-176.

6 2 H. M. Zhang, Z. M. Gong, K. W. Sun, R. M. Duan, P. H. Ji, L. Li, C. Li, K. Müllen  
7 and L. F. Chi, *J. Am. Chem. Soc.*, 2016, **138**, 11743–11748.

8 3 N. Chen, H. H. Wang, S. P. Kim, H. M. Kim, W. H. Lee, C. Hu, J. Y. Bae, E. S. Sim,  
9 Y. C. Chung, J. H. Jang, S. J. Yoo, Y. Zhuang and Y. M. Lee, *Nat Commun.*, 2021,  
10 **12**, 2367.

11 4 M. Liu, X. Hu, B. Hu, L. Liu and N. Li, *J. Membr. Sci.*, 2022, **642**, 119966.

12 5 J. Wang, Y. Zhao, B. P. Setzler, S. Rojas-Carbonell, C. Ben Yehuda, A. Amel, M.  
13 Page, L. Wang, K. Hu, L. Shi, S. Gottesfeld, B. Xu and Y. Yan, *Nat. Energy*, 2019,  
14 **4**, 392–398.

15 6 X. Y. Wu, N. J. Chen, H. A. Klok, Y. M. Lee and X. L. Hu, *Angew. Chem. Int. Ed.*,  
16 2021, e202114892.

17 7 C. Hu, J. H. Park, H. M. Kim, H. H. Wang, J. Y. Bae, N. Y. Kang, N. Chen and Y.  
18 M. Lee, *J. Membr. Sci.*, 2022, **647**, 120341.



- 1 8 X. Hu, Y. Huang, L. Liu, Q. Ju, X. Zhou, X. Qiao, Z. Zheng and N. Li, *J. Membr.*  
2 *Sci.*, 2021, **621**, 118964.
- 3 9 N. Chen, C. Hu, H. H. Wang, S. P. Kim, H. M. Kim, W. H. Lee, J. Y. Bae, J. H. Park  
4 and Y. M. Lee, *Angew Chem Int Ed.*, 2021, **60**, 7710-7718.
- 5 10 H. H. Wang, C. Hu, J. H. Park, H. M. Kim, N. Y. Kang, J. Y. Bae, W. H. Lee, N.  
6 Chen and Y. M. Lee, *J. Membr. Sci.*, 2022, **644**, 120160.
